## RESEARCH ARTICLE

# Phage-mediated Shiga toxin (Stx) horizontal gene transfer and expression in non-Shiga toxigenic *Enterobacter* and *Escherichia coli* strains

Rowaida K.S. Khalil<sup>1</sup>, Craig Skinner<sup>2</sup>, Stephanie Patfield<sup>2</sup> and Xiaohua He<sup>2,\*</sup>

<sup>1</sup>Department of Botany and Microbiology, Faculty of Science, Alexandria University, Alexandria 21511, Egypt and <sup>2</sup>Western Regional Research Center, U.S. Department of Agriculture, Agricultural Research Service, 800 Buchanan Street, Albany, CA 94710, USA

\*Corresponding author: Western Regional Research Center, U.S. Department of Agriculture, Agricultural Research Service, 800 Buchanan Street, Albany, CA94710, USA. Tel: +510-559-5823; Fax: +510-559-6429. Email: [xiaohua.he@ars.usda.gov](mailto:xiaohua.he@ars.usda.gov)

One sentence summary: Transduction of non-toxicogenic strains with Stx phages.

Editor: Nicholas Carbonetti

## ABSTRACT

*Enterobacter cloacae* M12X01451 strain recently identified from a clinical specimen produces a new Stx1 subtype (Stx1e) that was not neutralized by existing anti-Stx1 monoclonal antibodies. Acquisition of stx by *Ent. cloacae* is rare and origin/stability of stx<sub>1e</sub> in M12X01451 is not known. In this study, we confirmed the ability of Stx1a- and Stx1e-converting phages from an *Escherichia coli* O157:H7 strain RM8530 and M12X01451 respectively to infect several *E. coli* and *Ent. cloacae* strains. stx<sub>1e</sub> was detected in 97.5% and 72.5% of progenies of strains lysogenized by stx<sub>1e</sub> phage after 10 (T<sub>10</sub>) and 20 (T<sub>20</sub>) subcultures, versus 65% and 17.5% for stx<sub>1a</sub> gene. Infection of M12X01451 and RM8530 with each other's phages generated double lysogens containing both phages. stx<sub>1a</sub> was lost after T<sub>10</sub>, whereas the stx<sub>1e</sub> was maintained even after T<sub>20</sub> in M12X01451 lysogens. In RM8530 lysogens, the acquired stx<sub>1e</sub> was retained with no mutations, but 20% of stx<sub>1a</sub> was lost after T<sub>20</sub>. ELISA and western blot analyses demonstrated that Stx1e was produced in all strains lysogenized by stx<sub>1e</sub> phage; however, Stx1a was not detected in any lysogenized strain. The study results highlight the potential risks of emerging Stx-producing strains via bacteriophages either in the human gastrointestinal tract or in food production environments, which are matters of great concern and may have serious impacts on human health.

**Keywords:** ELISA; *Enterobacter cloacae*; *Escherichia coli* O157; horizontal gene transfer; Stx-converting bacteriophages; transduction

## INTRODUCTION

Shiga toxin-producing *Escherichia coli* (STEC) are major foodborne pathogens, capable of causing human diseases ranging from diarrhea to life-threatening complications such as hemolytic-uremic syndrome (McAllister *et al.* 2016). Virulence of STEC strains and their ability to cause severe diseases are linked to the activity of Shiga toxins (Stxs) (Smith *et al.* 2012; Bloch *et al.* 2015)

encoded by Stx-converting bacteriophages (Stx phages) (Strauch *et al.* 2008). These lambdoid temperate phages (Allison 2007; Łoś, Łoś and Węgrzyn 2011) can encode either stx<sub>1</sub> or stx<sub>2</sub> of which there are four and seven subtypes, respectively (Zhang *et al.* 2002; Mauro and Koudelka 2011; Scheutz *et al.* 2012).

Stx-converting phages can lyse their STEC hosts (Chibani-Chennoufi *et al.* 2004) in the gastrointestinal tract (GIT) and transfer stx genes from cell to cell via transduction,

representing a significant mechanism of horizontal gene transfer (HGT), and is most likely the cause of *stx* genes dissemination among a multitude of STEC serotypes (Gyles and Boerlin 2013). Following infection with a Stx-converting phage, the integrated *stx* genes either remain silent in the lysogens (Paul and Weinbauer 2010) or are expressed at low levels (Węgrzyn, Licznarska and Węgrzyn 2012). Upon induction by DNA damaging agents (such as mitomycin C or UV light), or by other factors that provoke the bacterial S.O.S. response, excision of prophage DNA from the host chromosome and initiation of the lytic cycle take place (Węgrzyn and Węgrzyn 2005; Imamovic and Muniesa 2012), followed by host cell lysis, expression of Stx (Allison et al. 2003) and release of phage particles that can transduce the *stx* genes to other bacteria (Tóth et al. 2003). Production of both Stx1 and Stx2 has been shown to increase upon induction of the Stx-encoding bacteriophages *in vitro* (Zhang et al. 2000). On the other hand, Stx1 has been demonstrated to be iron regulated, but iron regulation seems to have no impact on the expression of *stx*<sub>2</sub> (Pacheco and Sperandio 2012).

Phages play an integral role in the evolution of new food-borne pathogens (Brabban, Hite and Callaway 2005). Available evidence suggests that STEC O157:H7 has evolved from the enteropathogenic *E. coli* strain O55:H7 by the acquisition of two prophages encoding Stx1 and Stx2 (Ohnishi et al. 2002; Wick et al. 2005; Tóth et al. 2016). Several studies reported a limited host range for individual Stx phages (Saunders et al. 2001; Kelly, Vespermann and Bolton 2009). Stx phages can infect commensal *E. coli* (Wagner, Acheson and Waldor 1999; Muniesa et al. 2003; Gamage, McGannon and Weiss 2004), and convert Stx-negative *E. coli* strains *in vivo* as well as in natural environments (Gamage et al. 2003). Acquisition of *stx* by hosts other than *E. coli* (such as *Acinetobacter haemolyticus*, *Aeromonas* sp., *Citrobacter freundii*, *Enterobacter cloacae* (*Ent. cloacae*) and *E. albertii*) through Stx phages has been infrequently reported (Schmidt et al. 1993; Alperi and Figuera 2010; Ooka et al. 2012). However, the wide distribution of Stx1 and Stx2 variants in different bacteria indicates that these phages possess the ability of transmitting *stx* genes throughout members of Enterobacteriaceae.

*Ent. cloacae* is a part of the normal flora of the human GIT and is frequently found in environmental samples (Krzymińska et al. 2009). Although it is a fairly common nosocomial pathogen, there are few studies examining its pathogenic potential beyond opportunistic infections (Davin-Regli and Jean-Marie 2015). In contradiction to the fact that most *Enterobacter* members are often considered as typical commensals, the number of epidemiologic studies involving these microorganisms has been

increasing (Mezzatesta, Gona and Stefani 2012), reflecting the potential of *Ent. cloacae* strains as emerging pathogens. An emergent Stx variant named Stx1e was recently identified in an *Ent. cloacae* M12X01451 strain (Probert, McQuaid and Schrader 2014) isolated from a patient with a mild diarrheal illness. This new toxin is the most divergent subtype of the Stx1, and has only limited reactivity with the available commercial anti-Stx1 antibodies, therefore representing a challenge for detection. Because of *Ent. cloacae*'s reputation as a nosocomial pathogen, its clinical relevance in human pathogenicity, especially in gastrointestinal infections, has not yet been addressed.

More epidemiological studies have focused on *stx*<sub>2</sub>-encoding phages rather than *stx*<sub>1</sub>-encoding phages, since *stx*<sub>2</sub>-harboring strains are typically associated with more severe clinical outcomes (Ethelberg et al. 2004; Orth et al. 2007; Kawano et al. 2008). The ability of Stx-encoding phages from clinical EHEC O26 and EHEC O157 isolates to transduce the laboratory strain *E. coli* K-12, commensal *E. coli* and EPEC of various origins within the GIT has been demonstrated *in vivo* (Cornick et al. 2006). However, there are limited studies concerning the potential of Stx1-encoding phages to infect other non-pathogenic or pathogenic strains. Incorporation of *stx*<sub>1e</sub> in particular, which is difficult to detect by current immunoassays, into established human pathogens could present diagnostic complications. Since the *stx*<sub>1e</sub> operon could be disseminated via phage to host-adapted strains, we investigated the capability of the *stx*<sub>1e</sub>-encoding prophage to lysogenize other *E. coli* or *E. cloacae* strains. Lysogenization was compared to that by a prophage induced from an *E. coli* O157:H7 clinical strain, encoding for another *stx*<sub>1</sub> subtype. Differences in *stx* gene(s) acquisition, stability and Stx expression were evaluated at the time of infection and after multiple subcultivation steps. The described experimental set up mimics to an extent the clinical scenario of harmless commensal organisms colonizing the GIT environment, together with other *stx*-carrying pathogenic strains. Under conditions of extended antibiotic treatment, such co-existence may result in an effective conversion of the harmless organisms into new strains with pathogenic potential, which may contribute to bacterial pathogenesis and pose high risks to human health.

## MATERIALS AND METHODS

### Bacterial strains and growth conditions

Strains used in this study are listed in Table 1. The *stx*<sub>1e</sub>-positive *Ent. cloacae* M12X01451 strain kindly provided by

**Table 1.** Bacterial strains used in this study.

| Bacterial strains                                                                | <i>stx</i> gene          | Serotype | <i>stx</i> <sub>1a</sub> spot-test | <i>stx</i> <sub>1e</sub> spot test | Source          | Reference                            |
|----------------------------------------------------------------------------------|--------------------------|----------|------------------------------------|------------------------------------|-----------------|--------------------------------------|
| <b>Donor strains</b>                                                             |                          |          |                                    |                                    |                 |                                      |
| <i>Enterobacter cloacae</i> M12X01451 (harboring <i>stx</i> <sub>1e</sub> phage) | <i>stx</i> <sub>1e</sub> | -        | +                                  | -                                  | Clinical sample | Probert, McQuaid and Schrader (2014) |
| <i>Escherichia coli</i> RM8530 (harboring <i>stx</i> <sub>1a</sub> phage)        | <i>stx</i> <sub>1a</sub> | O157:H7  | -                                  | +                                  | CDC 2886-75     | Kyle et al. (2012)                   |
| <b>Host (recipient) strains</b>                                                  |                          |          |                                    |                                    |                 |                                      |
| <i>Enterobacter cloacae</i> 13047                                                | -                        | -        | +                                  | +                                  | ATCC            | -                                    |
| <i>Escherichia coli</i> 25922                                                    | -                        | -        | -                                  | -                                  | ATCC            | -                                    |
| <i>Escherichia coli</i> DH5α                                                     | -                        | -        | +                                  | +                                  | Invitrogen      | This work                            |
| <i>Escherichia coli</i> K-12 (29425)                                             | -                        | -        | -                                  | -                                  | ATCC            | Skinner et al. (2013)                |
| <i>Escherichia coli</i> 465-97                                                   | -                        | O157:H7  | +                                  | +                                  | USDA-FSIS       | USDA (2012)                          |

Dr William Probert at the Richmond Department of Public Health (Richmond, CA) and the *stx*<sub>1a</sub>-positive *E. coli* O157:H7 RM8530 strain (CDC 2886-75) were used as the donor strains for the phage transduction experiments. The *Ent. cloacae* type strain (ATCC 13047), the *E. coli* strain ATCC 25922 and the *E. coli* K-12 strain ATCC 29425 obtained from the American Type Culture Collection, together with other *stx*-negative strains (Table 1), served as recipients for lysogenization experiments (unless otherwise stated) and were used as negative controls in PCR analyses. Strains were routinely grown overnight in Luria–Bertani (LB) broth at 37°C with shaking at 150 rpm or on LB agar plates. Stock cultures of each strain were prepared by centrifugation (8000 × g, 10 min), pellets were suspended in 1 mL of fresh LB, 0.5 mL portions were transferred to 2 mL beads-containing cryogenic vials (Corning) and stored at –80°C for further use. Purity of *E. coli* O157 strains was routinely checked by testing their ability to ferment sorbitol on Sorbitol MacConkey agar (SMAC; Oxoid), followed by the detection of *rbfE* gene using the latex agglutination kit (Oxoid DRYSPOE *E. coli* O157, Oxoid, Ltd, Basingstoke, UK), according to the manufacturer's instructions.

Prior to infection experiments, the absence of *stx* in *Ent. cloacae* 13047, *E. coli* DH5 $\alpha$  and *E. coli* 465–97 and the presence of *stx*<sub>1a</sub> in *E. coli* RM8530 and *stx*<sub>1e</sub> in *Ent. cloacae* M12X01451 were verified by colony PCR. Positive bands characteristic of *stx*<sub>1a</sub> (amplicon size of 477 bp) and *stx*<sub>1e</sub> (amplicon size of 250 bp) genes were detected (Fig. S1, Supporting Information).

### Induction and purification of *stx* phages

*Ent. cloacae* strain M12X01451 (harboring *stx*<sub>1e</sub>-encoding prophage) and *E. coli* O157:H7 strain RM8530 (harboring *stx*<sub>1a</sub>-encoding prophage) were grown from frozen cryogenic vial stocks, streaked on LB agar plates and grown from single colonies (Strauch, Schaudinn and Beutin 2004) overnight at 37°C in LB broth. LB broth was inoculated with 0.1% (v/v) of each strain's overnight culture, and incubated at 37°C with shaking (150 rpm) for 3 h until the early exponential phase (~OD<sub>600</sub> = 0.05, ca. ~ 6 log CFU mL<sup>-1</sup>). At this point, phage induction was carried out by adding mitomycin C to a final concentration of 50 ng mL<sup>-1</sup> to the culture bottles, which were further incubated for 16–18 h at 37°C with shaking (150 rpm) in the dark, followed by centrifugation at 14 000 × g for 20 min at 4°C, to separate the cells and other debris from phage particles. Cell-free supernatants (CFSs) were filter sterilized using 0.2  $\mu$ m sterile EMD Millipore Millex filters (Thermo Fisher Scientific, Pittsburgh, PA), and treated with 2  $\mu$ L of DNase (10 U mL<sup>-1</sup>; Sigma-Aldrich) for 1 h at 37°C to digest possible genomic DNA contamination. Phage particles in both DNase-treated CFSs were precipitated by adding 1:6 volume of PEG/NaCl solution (20% polyethylene-glycol-8000, 2.5 M NaCl), and incubating overnight at 4°C (Lunder et al. 2008). Resulting phage precipitates were separated by centrifugation as described above, suspended in 2 mL of SM buffer (100 mM NaCl, 10 mM MgSO<sub>4</sub>; 50 mM Tris-Cl, pH 7.5) to which two to three drops of chloroform were added, and stored at 4°C for further use (Sambrook and Russell 2001). Aliquots of the purified lysates were used to amplify the *stx* gene by PCR to confirm the prophage induction.

### Phage enumeration

Phage titers were determined by the soft-agar overlay assay (Velandia et al. 2012) with slight modifications. A total of 100  $\mu$ L of filtered media containing either *stx*<sub>1e</sub>-carrying or *stx*<sub>1a</sub>-carrying phages was diluted 10-fold in SM buffer, 500  $\mu$ L aliquots

of each dilution were mixed with 100  $\mu$ L of CaCl<sub>2</sub> (0.1 M final concentration) and 100  $\mu$ L of exponential-phase culture of *Ent. cloacae* 13047 (for enumeration of *stx*<sub>1e</sub> phage) and *E. coli* DH5 $\alpha$  (for enumeration of *stx*<sub>1a</sub> phage) was added to the phage mixture. The phage-host cell mixtures were left to stand at 37°C for 30 min to allow phage particle adsorption (Muniesa et al. 2004; Muniesa, Serra-Moreno and Jofre 2004), added to test tubes containing 3 mL of molten soft LB agar (0.7% agarose w/v), mixed by phage style mixing and then poured in duplicates over pre-warmed LB agar plates. Plates were left for 15 min at room temperature (RT) to obtain solidified overlays, inverted and incubated overnight at 37°C until the appearance of plaques. Plates prepared simultaneously with overlay mixtures either lacking the phage lysate dilutions or the exponential-phase cultures of host strains were used as negative controls. Plaques were enumerated on each plate and phage titers were expressed as plaque-forming units per milliliter (PFU mL<sup>-1</sup>) of each phage-containing lysate (Anderson et al. 2011).

### Preparation of high titer phage stock solutions

For the infection and transduction experiments, high titers of *stx*<sub>1e</sub> and *stx*<sub>1a</sub> purified phage-containing lysates were prepared according to the method of Allison et al. (2003). *Enterobacter cloacae* 13047 and *E. coli* 465–97 were grown in LB as previously described to an OD<sub>600</sub> of ~0.05, *stx*<sub>1e</sub>- and *stx*<sub>1a</sub>-phage lysates were then added to the corresponding cultures at a multiplicity of infection (MOI) of 0.5. The infected cultures were further incubated overnight at 37°C with shaking (150 rpm), and the corresponding phages were recovered from the resulting supernatants after the removal of whole cells and cellular debris by centrifugation at 14 000 × g (4°C, 20 min) followed by filter sterilization. For further use, the phage stock solutions containing *stx*<sub>1e</sub> and *stx*<sub>1a</sub> phages were stored at 4°C with a few drops of chloroform as previously stated.

### Host range and infectivity of *stx*<sub>1</sub> phages

The spot test (Holguín et al. 2015) was employed to test the susceptibility of host strains to infection by the *stx*<sub>1e</sub> and *stx*<sub>1a</sub> phages with slight modifications. A total of 500  $\mu$ L aliquots of the early exponential phase (OD<sub>600</sub> ~ 0.05) cultures of each host strain (Table 1) were mixed with 100  $\mu$ L of CaCl<sub>2</sub> (0.02 M final concentration) and 3 mL molten soft LB agar, poured onto LB agar plates, and allowed to solidify at RT. A total of 15  $\mu$ L aliquots of each phage stock solution (containing *stx*<sub>1e</sub> and *stx*<sub>1a</sub> phages) were spotted onto the bacterial overlays, dried for 15–20 min. Plates were incubated at 37°C for 24 h. Results were considered as positive for each *stx*<sub>1</sub>-phage stock solution if clear lysis zones were observed (Carlson 2005).

Sensitivity of host strains to both *stx* phages was further assessed by the optical density (OD) method (Muniesa et al. 2003) with some modifications. Each host strain was grown in 5 mL of LB at 37°C with shaking until the early exponential phase, then mixed with each *stx*<sub>1</sub>-phage stock solution (MOI = 0.5) and 100  $\mu$ L of 1 M CaCl<sub>2</sub> (0.02 M final concentration) as previously described. Cultures were incubated at 37°C, and growth/cell lysis of infected cultures was monitored hourly at OD<sub>600</sub> for 5 h. A total of 1 mL aliquots of each infected culture were centrifuged at 6000 × g for 10 min at 4°C, washed to remove loosely attached phage particles as previously described, suspended in 1 mL of fresh LB broth, serially diluted in 0.1% sterile PW and the surviving populations were estimated by colony count on LB agar plates (expressed as log<sub>10</sub> colony-forming units per mL; CFU mL<sup>-1</sup>). OD

measurements and colony counts were performed in duplicate, results were averaged and compared to those of control cultures (prepared in a similar manner but without the *stx*<sub>1</sub>-phage stock solution). The spot and the OD tests were repeated at least three times for each strain grown in the presence of each phage stock solution ( $n = 3$ ).

### Phage-mediated transduction and generation of lysogens

All *stx*-negative host strains (Table 1) with an exception of *E. coli* ATCC 25922 and *E. coli* K-12 strains were lysogenized by each *stx*-phage stock solution according to the methods of Muniesa *et al.* (2004) and Bielaszewska *et al.* (2007) with some modifications. Host strains were grown at 37°C from stock cryogenic vials in 3 mL of LB broth until the early exponential phase, from which 100  $\mu$ L aliquots were transferred to 3 mL of LB broth tubes containing 100  $\mu$ L of 1 M CaCl<sub>2</sub> (0.02 M final concentration) and 500  $\mu$ L of each phage stock, and incubated overnight at 37°C without shaking. Infected cells were recovered by centrifugation at 6000  $\times$  g (20 min, 4°C), and cell pellets were washed three times with phosphate buffer saline (PBS) and one time with 0.1 M Glycine-HCl (pH 2.3) to remove non-specifically bound phage particles (Maaß *et al.* 2014), and avoid false *stx*-positive PCR results. The washed pellets were then suspended in 3 mL of LB broth, serially 10-fold diluted in 0.1% sterile PW, plated onto LB plates and incubated overnight at 37°C. At least 10 well-isolated colonies (designated as T<sub>0</sub> colonies) from duplicate plates of each host strain were screened by PCR for the presence of *stx*<sub>1e</sub> and/or *stx*<sub>1a</sub> genes. T<sub>0</sub> colonies were maintained on LB plates, stored at 4°C and subcultured on LB agar 24 h prior experimental analysis.

### PCR analyses

PCR assays were conducted to detect the presence/absence of *stx*<sub>1e</sub> and *stx*<sub>1a</sub> in bacterial genomic DNA, colonies of each lysogenized recipient, phage plaques and the *stx*<sub>1a</sub>- and *stx*<sub>1e</sub>-phage stock solutions as previously described (Skinner *et al.* 2013) with a few modifications. Single colonies and phage plaques were suspended in 1 mL of DNase-free water in sterile eppendorf tubes, heated to 95°C for 10 min and centrifuged, from which 2  $\mu$ L was used as a template for PCR amplification. For purified phage stock solutions and genomic DNA, 2  $\mu$ L were directly heated to 95°C for 10 min, and used as templates for PCR amplifications. PCR amplifications were performed using a Bio-rad T100 Thermal cycler, in 25  $\mu$ L volume with 12.5  $\mu$ L Taq-Green master mix (Promega, Madoson, WI), 9.5  $\mu$ L DNase-free water and 1  $\mu$ L (from a 20  $\mu$ M stock) of either *stx*<sub>1e</sub>-specific or *stx*<sub>1a</sub>-specific primers (forward, 5'-TATTGATGATTTTCAGGGG-3'; reverse, 5'-GCGTAAATGTCAAACCGTT-3' and forward, 5'-CCTTTCCAGGTACAACAGCGGTT-3'; reverse, 5'-GGAACTCATCAGATGCCATTCTGG-3' respectively) (Scheutz *et al.* 2012; Skinner *et al.* 2016). The PCR program used was as follows: 95°C denaturation for 1 min, 32 cycles of 94°C denaturation for 30 s, 65°C annealing for 30 s, 68°C extension for 75 s and a final step of 68°C extension for 7 min. A 5  $\mu$ L portion of each amplified product was resolved by electrophoresis on 1.0% (w/v) agarose gel, stained with gel red, visualized using a UV transilluminator at a wavelength of 420 nm and documented with a Gel Doc 2000 Fluorescent Imaging System (U:Genius, UK).

### Stability of *stx* in lysogenized strains

Ten colonies resulting from each phage-infected host strain (T<sub>0</sub>) that were confirmed *stx* positive by PCR were grown overnight at 37°C in LB broth, where equal aliquots from each culture were combined, and subcultured daily (0.1% v/v) in 10 mL of fresh LB at 37°C for 10 days. Subcultures of the tenth day were serially diluted 10-fold in 0.1% sterile PW, spread on LB agar plates and incubated overnight at 37°C, where 10 colonies (designated as T<sub>10</sub> colonies) were tested for the presence of *stx* genes by PCR. Ten *stx*-positive colonies were grown overnight in LB broth and equal aliquots from each culture were combined and subcultured daily (0.1% v/v) for 10 additional days, spread on LB agar plates, and again 10 colonies (designated as T<sub>20</sub> colonies) were examined for *stx* by colony PCR. The stability of *stx*<sub>1e</sub> or *stx*<sub>1a</sub> genes in each lysogenized host strain was assessed based on the percentage of *stx*-positive colonies (Bielaszewska *et al.* 2007). The wild-type donor strains (originally harboring the *stx*-encoding prophages) and the *stx*-negative host strains (Table 1) were used as positive and negative controls respectively in all PCR experiments.

### Evaluation of Stx1 production by bacteria using enzyme-linked immunosorbent assays (ELISAs)

Sandwich ELISAs were performed as previously described (He *et al.* 2016) with some modifications. Briefly, plates were coated with monoclonal antibody (mAb) Stx1e-2 or Stx1a-1 (100  $\mu$ L well<sup>-1</sup>, 5  $\mu$ g mL<sup>-1</sup> in PBS), and incubated overnight at 4°C after washing and blocking steps (Skinner *et al.* 2016). Bacterial culture supernatants were added (80  $\mu$ L well<sup>-1</sup>) to each well and incubated for 1 h at RT, followed by six washes with TBST. Stx1 polyclonal antibody (200 ng mL<sup>-1</sup> in blocking solution) was then added (80  $\mu$ L well<sup>-1</sup>), incubated for 1 h at RT and plates were again washed six times with TBST. HRP-conjugated goat anti-rabbit IgG (1:10 000; Promega) in blocking solution was added to the plates and incubated for 1 h at RT, followed by six washes with TBST. Finally, TMB substrate (Sigma-Aldrich, St. Louis, MO) was added (80  $\mu$ L well<sup>-1</sup>), and the reaction was stopped after 10 min with 80  $\mu$ L well<sup>-1</sup> of 0.3 N HCL. The ELISA signals (A<sub>450</sub>) were measured using a Victor 3 plate reader (Perkin-Elmer, Shelton, CT). All ELISAs were repeated at least twice. Results were considered Stx1 positive when ELISA signal-to-noise ratio (s/n) was  $\geq 3$  and Stx1 negative when s/n < 3.

### Western immunoblot analysis

Western blots were conducted as previously described (He *et al.* 2016). Briefly, pure Stx1e toxoid and bacterial culture supernatants (7  $\mu$ L) were denatured at 72°C for 10 min in 1X Nu-Page LDS loading buffer, and then separated on a 4%–12% NuPAGE Novex Bis-Tris mini gel (Invitrogen, Carlsbad, CA). The proteins were transferred to a PVDF membrane (pore size, 0.45  $\mu$ m), blocked with 2% ECL Prime blocking agent (GE Healthcare, UK) in PBST and washed three times with PBST. Stx1e-specific mAb, Stx1e-3 (Skinner *et al.* 2016), was diluted to 1  $\mu$ g mL<sup>-1</sup> in blocking solution and incubated with the blots for 1 h at RT. After washing three times, the blots were incubated with HRP-conjugated goat anti-mouse IgG (Promega) at 5 ng mL<sup>-1</sup> for 1 h at RT. The blots were developed using Lumigen TMA-6 (Lumigen, Southfield, MI) substrate and visualized using a FluorChem HD2 (Alpha Innotech, San Leandro, CA).

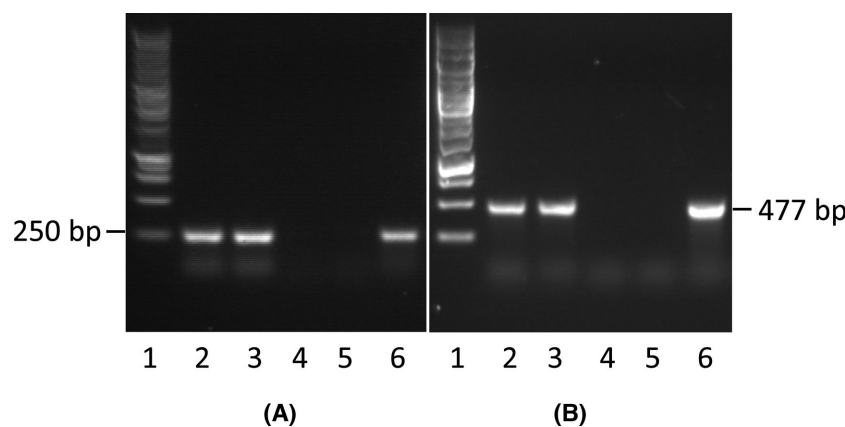

**Figure 1.** Detection of phage-encoded *stx* genes by PCR analysis. (A) Lane 1, DNA ladder; lanes 2–3, PCR products of *stx*<sub>1e</sub> from DNase-treated supernatants of *Ent. cloacae* M12X01451 under non-inducing (lane 2) and inducing (lane 3) conditions; lane 4, *stx*<sub>1e</sub> PCR products from DNase-treated supernatants of *Ent. cloacae* 13047 under inducing conditions; lanes 5–6, *stx*<sub>1e</sub> PCR products from *Ent. cloacae* M12X01451 genomic DNA with (lane 5) and without (lane 6) DNase treatment. (B) Lane 1, DNA ladder; lanes 2–3, *stx*<sub>1a</sub> PCR products from DNase-treated supernatants of RM8530 under non-inducing (lane 2) and inducing (lane 3) conditions; lanes 4, *stx*<sub>1a</sub> PCR products from DNase-treated supernatants of *E. coli* 465–97 under inducing conditions; lanes 5–6, *stx*<sub>1a</sub> PCR products from RM8530 genomic DNA with (lane 5) and without (lane 6) DNase treatment. The sizes of the *stx*<sub>1e</sub> and *stx*<sub>1a</sub> PCR products are indicated at the left and right side of the figure.

### Sequencing of *stx*<sub>1e</sub>

The full *stx*<sub>1e</sub> operon in *E. coli* O157:H7 strain (RM8530) lysogenized by the *stx*<sub>1e</sub>-phage stock solution was sequenced. Genomic DNA was prepared using 5 mL cultures derived from 10 colonies of the lysogenized strain which had been subcultured 20 times using a DNA Stool Mini kit (Qiagen, Valencia, CA). The *stx*<sub>1e</sub> operon was analyzed by PCR using Phusion polymerase (New England Biolabs), Stx1e-A-F1 (Stx1e-A-F1: GGAATTCATATGATGATATTGATGATTTTCAGGG and Stx1e-B-R1 (Stx1e-B-R1: GTGGTCTCGAGGCGAAAAATCACCTCAC) primers and genomic DNA (diluted 1:100) as a template. The resulting PCR products were then gel extracted (Qiagen) and cloned into the pCR 4.0 vector using a Zero-Blunt cloning kit (Qiagen). Plasmid DNA was extracted from 35 colonies (from 10 cloning plates), and the *stx*<sub>1e</sub> operon was sequenced using M13-F and M13-R primers (Elim Biopharmaceuticals, Hayward, CA).

### Statistical analysis

Statistical analysis of the OD method's data was performed using IBM-SPSS software v. 20.0 (SPSS Inc., Chicago, IL, 207 USA). A one-way analysis of variance and post hoc least significant difference were used for the analysis of normally distributed data. Significance differences between measurement means were accepted at  $P < 0.05$  level. Results are presented as mean  $\pm$  standard deviation (SD) of readings from three independent experiments ( $n = 3$ ).

## RESULTS

### Confirmation of the presence of *stx* temperate bacteriophages in host strains

To confirm that *stx*<sub>1a</sub> and *stx*<sub>1e</sub> genes in RM8530 and M12X01451 strains were prophage encoded, DNA from representative phage plaques and phage stock solutions prepared using these strains were used as templates for PCR amplification of the *stx*<sub>1a</sub> and *stx*<sub>1e</sub> genes, where both genes were detected (Fig. S1A and B, Supporting Information, lanes 7 and 8).

To ensure that these PCR products were not amplified from contaminated genomic DNA, supernatants of M12X0145 and

RM8530 cultures were treated with DNase before PCR analysis. Figure 1 shows that PCR products (*stx*<sub>1a</sub> and *stx*<sub>1e</sub>) were obtained from both M12X0145 and RM8530 strains with or without mitomycin C treatment, suggesting that some phage particles were spontaneously induced by the two host strains. Formation of stable lysogens in these two strains was also examined by PCR using genomic DNA as templates. PCR products (*stx*<sub>1e</sub> and *stx*<sub>1a</sub>) were detected using genomic DNA of M12X01451 and RM8530 strains without DNase treatment, confirming the incorporation of the phages into the hosts' genomic DNA. No PCR products were obtained using genomic DNA when treated with DNase, which confirms that the genomic DNA used for PCR was not contaminated with the *stx* phages.

### Infectivity of the *stx*<sub>1a</sub> and *stx*<sub>1e</sub> phages to different host strains

The spot test and the OD method were conducted to assess the ability of the *stx*<sub>1a</sub> and *stx*<sub>1e</sub> phages to infect a range of host strains (Table 1). Small turbid plaques were observed on overlay plates of *Ent. cloacae* 13047, *E. coli* DH5 $\alpha$ , *E. coli* 465–97 and RM8530 spotted with *stx*<sub>1e</sub>-phage stock solution, and overlay plates of M12X01451, and 13047 strains, *E. coli* DH5 $\alpha$  and *E. coli* 465–97 spotted with *stx*<sub>1a</sub>-phage stock solution. No lytic areas were observed in plates seeded with cultures of the two donor strains spotted with their own phage stocks, or *E. coli* K-12, or *E. coli* ATCC 25922 strains spotted with either *stx*-phage stocks. The two latter strains were therefore excluded from further investigations.

The infectivity of *stx*<sub>1a</sub>- and *stx*<sub>1e</sub>-phage stock solutions to a range of host strains was additionally confirmed based on the final ODs and the corresponding final population counts of each infected culture after 5 h of incubation (Fig. 2). Negative control cultures of each host strain that did not receive either *stx*-phage stock solution had OD values ranging from 0.7 to 0.8 ( $\sim 9 \log \text{CFU mL}^{-1}$ ) after 5 h of incubation, significantly higher than those of cultures infected with the *stx* phages ( $P < 0.05$ ). The susceptibility of host strains to the two phage stock solutions varied significantly, and host strains grown in the *stx*<sub>1e</sub>-phage stock solution recorded generally lower final ODs than those grown in the *stx*<sub>1a</sub>-phage stock solution ( $P < 0.05$ ). Based on their final culture ODs, phage-infected cultures were subjectively classified

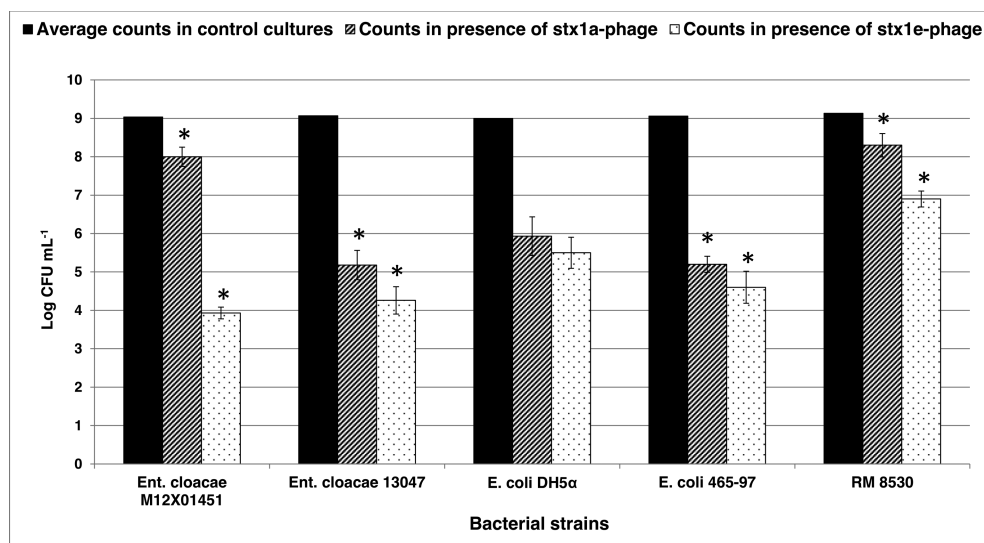

**Figure 2.** Susceptibility of different bacterial strains to lysis by *stx*<sub>1a</sub> and *stx*<sub>1e</sub> phages. Each host strain was grown from a single colony in LB at 37°C with shaking to an OD<sub>600</sub> of approximately 0.05 (~6 log CFU mL<sup>-1</sup>), then mixed with 100 μL of CaCl<sub>2</sub> and each phage stock solution (MOI = 0.5). Growth/cell lysis of each infected culture was monitored spectroscopically (OD<sub>600</sub>) every hour for up to 5 h without the presence of inducing agent. The corresponding phage-free cultures were grown to serve as controls. Y-error bars represent the standard error of the mean population counts of host strains from three independent experiments (n = 3). An asterisk denotes statistically different values (P < 0.05) of average population counts of each strain grown in the presence of each phage lysate.

into highly susceptible (final ODs < 0.1, including *Ent. cloacae* 13047 and *E. coli* 465–97), intermediately susceptible (final ODs between 0.2 and 0.3, including *E. coli* DH5α) and non-susceptible (final OD > 0.3, including RM8530) host strains.

*Enterobacter cloacae* M12X01451 was the most susceptible strain to its original phage stock solution (*stx*<sub>1e</sub> positive), where the infected cultures had final population counts of 3.93 log CFU mL<sup>-1</sup> (more than 5 log units of reduction). In contrast, the growth reduction of the RM8530 strain in the presence of *stx*<sub>1e</sub> phage was significantly (P < 0.05) less (approximately 2 log units of reduction). *Enterobacter cloacae* 13047 and *E. coli* 465–97 strains were highly susceptible to both *stx*<sub>1a</sub>- and *stx*<sub>1e</sub>-phage stock solutions, as indicated by the sharp drop in their culture ODs compared to their controls, and their corresponding CFU mL<sup>-1</sup> (Fig. 2). Susceptibility of *E. coli* DH5α to *stx*<sub>1a</sub>- and *stx*<sub>1e</sub>-phage stock solutions (5.93 and 5.5 log CFU mL<sup>-1</sup>, respectively) was statistically similar (P > 0.05), although both infected cultures exhibited significantly lower ODs and population counts compared to the control culture (not infected by either *stx* phage).

### Stability of the *stx* phages in lysogenized strains

According to the spot test and the OD experiments, the *stx*<sub>1a</sub> phage carried by RM8530 and the *stx*<sub>1e</sub> phage carried by M12X01451 were able to lysogenize the selected host strains with different incidences. To check if stable lysogens were produced, the presence of *stx* phages was examined by PCR amplification of the *stx* genes using 10 colonies randomly picked from the culture plates immediately after phage infection (T<sub>0</sub>), after 10 (T<sub>10</sub>) and 20 (T<sub>20</sub>) generations. Table 2 indicates that the *stx*<sub>1a</sub> and *stx*<sub>1e</sub> phages were able to lysogenize all bacterial strains listed, and that *stx*<sub>1e</sub> gene was stably maintained in almost all cells of lysogenized strains up to 20 subcultivation steps, except for *E. coli* DH5α, in which the *stx*<sub>1e</sub> gene was lost in all colonies examined after T<sub>20</sub>.

The *stx*<sub>1a</sub> gene in hosts lysogenized by the *stx*<sub>1a</sub> phage was not as stable compared to the *stx*<sub>1e</sub> gene, especially in the host

M12X01451 (originally carries the *stx*<sub>1e</sub> prophage), where the *stx*<sub>1a</sub> gene was completely lost after T<sub>10</sub>. In contrast, *stx*<sub>1a</sub> was still retained in lysogens of *Ent. cloacae* 13047 strain up to 10 subcultures, but 40% of colonies lost the gene at the T<sub>20</sub> (Table 2). Subculturing of *E. coli* DH5α and *E. coli* 465–97 lysogenized by *stx*<sub>1a</sub> phage for 10 days resulted in 30% (7/10) and 10% (9/10) *stx*<sub>1a</sub> loss, and the loss increased to 90% and 100% respectively after 10 additional subcultivation steps (Table 2).

Lysogenization of *Ent. cloacae* M12X01451 and RM8530 donor strains (originally carrying *stx*<sub>1e</sub> and *stx*<sub>1a</sub> prophages) by *stx*<sub>1a</sub> and *stx*<sub>1e</sub> phages respectively resulted in their acquisition of an additional *stx* phage, hence the production of lysogens with two *stx*-harboring prophages. To examine the effect of acquiring a new phage on the stability of the existing phage in the lysogenized bacterial cells, the newly formed double lysogens were tested by the colony PCR for the presence of their original *stx* gene at T<sub>20</sub>. *stx*<sub>1e</sub> gene was stably maintained in all T<sub>20</sub> colonies of *Ent. cloacae* 12X01451 strain lysogenized by the *stx*<sub>1a</sub> phage, whereas 20% of T<sub>20</sub> colonies lost the *stx*<sub>1a</sub> gene originally carried by the RM8530 strain after infection by the *stx*<sub>1e</sub> phage (Table 2).

To further investigate the stability of the acquired *stx*<sub>1e</sub> gene in a new host that already has a *stx*<sub>1a</sub>-encoded prophage, the full *stx*<sub>1e</sub> operon in T<sub>20</sub> progenies of the RM8530 lysogen (*stx*<sub>1a</sub> positive) was sequenced. Of the 35 randomly picked colonies from 10 cloning plates, all of them were identical to the original sequence of the *stx*<sub>1e</sub> gene (Probert, McQuaid and Schrader 2014), and no DNA recombination or mutations were found.

### Production of Stx1e and Stx1a in hosts lysogenized by *stx* phages

The production of Stx1e in strains of *Ent. cloacae* 13047, *E. coli* DH5α and *E. coli* 465–97 lysogenized by *stx*<sub>1e</sub> phage was evaluated by ELISA (Table 3). Stx1e was detected in all three strains (Table 3), although the percentage of colonies that produced the toxin varied from one host to another (Table S1, Supporting Information). For the *E. coli* DH5α lysogen, Stx1e was only detected

**Table 2.** Detection of *stx*<sub>1e</sub> and *stx*<sub>1a</sub> genes in strains immediately (T<sub>0</sub>), at 10 (T<sub>10</sub>) and 20 (T<sub>20</sub>) subcultivation steps after infection by *stx*<sub>1e</sub> and *stx*<sub>1a</sub> phages. Ten colonies were randomly picked from all T<sub>0</sub>, T<sub>10</sub> and T<sub>20</sub> cultures respectively, and colony PCR was performed for the presence of *stx*<sub>1e</sub> and/or *stx*<sub>1a</sub> genes.

| <i>stx</i> <sub>1</sub> phage  | Lysogenized strains                                | No. of colonies containing a <i>stx</i> gene/total no. of colonies tested (n = 10) |                 |                 |
|--------------------------------|----------------------------------------------------|------------------------------------------------------------------------------------|-----------------|-----------------|
|                                |                                                    | T <sub>0</sub>                                                                     | T <sub>10</sub> | T <sub>20</sub> |
| <i>stx</i> <sub>1e</sub> phage | <i>Enterobacter cloacae</i> 13047                  | 10/10                                                                              | 9/10            | 9/10            |
|                                | <i>Escherichia coli</i> DH5α                       | 10/10                                                                              | 10/10           | 0/10            |
|                                | <i>Escherichia coli</i> 465–97                     | 10/10                                                                              | 10/10           | 10/10           |
|                                | <i>Escherichia coli</i> O157 RM8530                | 10/10                                                                              | 10/10           | 10/10           |
| <i>stx</i> <sub>1a</sub> phage | <i>Enterobacter cloacae</i> M12X01451              | 10/10                                                                              | 0/10            | 0/10            |
|                                | <i>Enterobacter cloacae</i> 13047                  | 10/10                                                                              | 10/10           | 6/10            |
|                                | <i>Escherichia coli</i> DH5α                       | 10/10                                                                              | 7/10            | 1/10            |
|                                | <i>Escherichia coli</i> 465–97                     | 10/10                                                                              | 9/10            | 0/10            |
| <i>stx</i> <sub>1e</sub> phage | <i>Escherichia coli</i> O157 RM8530 <sup>a</sup>   | 10/10                                                                              | 10/10           | 8/10            |
| <i>stx</i> <sub>1e</sub> phage | <i>Enterobacter cloacae</i> M12X01451 <sup>a</sup> | 10/10                                                                              | 10/10           | 10/10           |

<sup>a</sup>Denotes the stability of the *stx* gene carried on the original prophage in *E. coli* O157 RM8530 (*stx*<sub>1a</sub>-positive) and *Ent. cloacae* M12X01451 (*stx*<sub>1e</sub> positive) strains after being lysogenized with the *stx*<sub>1e</sub> and *stx*<sub>1a</sub> phage, respectively.

**Table 3.** Detection of Stx1e toxin in supernatants of host strains lysogenized by *stx*<sub>1e</sub> phage at different subcultivation steps by ELISA. Results were considered Stx1e positive when ELISA signal to noise (s/n) ≥ 3.

| Lysogenized strains               | Subcultivation step | No. of Stx1e-positive colonies/total no. of colonies tested (n = 10) |
|-----------------------------------|---------------------|----------------------------------------------------------------------|
| <i>Enterobacter cloacae</i> 13047 | T <sub>0</sub>      | 5/10                                                                 |
|                                   | T <sub>10</sub>     | 7/10                                                                 |
|                                   | T <sub>20</sub>     | 8/10                                                                 |
| <i>Escherichia coli</i> DH5α      | T <sub>0</sub>      | 0/10                                                                 |
|                                   | T <sub>10</sub>     | 9/10                                                                 |
|                                   | T <sub>20</sub>     | 0/10                                                                 |
| <i>Escherichia coli</i> 465–97    | T <sub>0</sub>      | 10/10                                                                |
|                                   | T <sub>10</sub>     | 8/10                                                                 |
|                                   | T <sub>20</sub>     | 8/10                                                                 |

in culture supernatants of T<sub>10</sub> (90%), but not in those of T<sub>0</sub> or T<sub>20</sub>; however, their s/n values seemed very low compared to those recorded for other Stx1e-positive supernatants of the other lysogenized strains. Stx1e was detected in 50% of cells tested from the T<sub>0</sub> lysogen culture of *Ent. cloacae* 13047, and subsequent subculturing resulted in more Stx1e-positive colonies (70% at T<sub>10</sub>, and 80% at T<sub>20</sub>). For lysogen *E. coli* 465–97, Stx1e was detectable in most colonies, including those from T<sub>0</sub> (100%), T<sub>10</sub> (80%) and T<sub>20</sub> (80%) cultures. Notably, higher levels of Stx1e, as demonstrated by the ELISA s/n data (Table S2, Supporting Information), were detected in *E. coli* 465–97 cells from T<sub>10</sub> cultures, compared to those from T<sub>0</sub> and T<sub>20</sub> cultures.

To avoid the cross-reaction between Stx1a and Stx1e, production of Stx1e in RM8530 lysogenized by *stx*<sub>1e</sub> phage was evaluated by western blot analysis, instead of ELISA, using a Stx1e-specific monoclonal antibody. Figure 3 indicates that Stx1e was detected in all 10 colonies picked from the T<sub>0</sub>, T<sub>10</sub> and T<sub>20</sub> plates; however, levels of Stx1e varied significantly as shown by the intensity of the protein bands.

For strains *Ent. cloacae* M12X01451, 13047, *E. coli* DH5α and *E. coli* 465–97 lysogenized by the *stx*<sub>1a</sub> phage, Stx1a was not detected either by ELISA or western blot analyses in any representative colonies after mitomycin C induction, despite confirming the presence of the *stx*<sub>1a</sub> gene by PCR analysis (Table 2). The RM8530 strain did express detectable levels of Stx1a (s/n ≥ 3, data not shown).

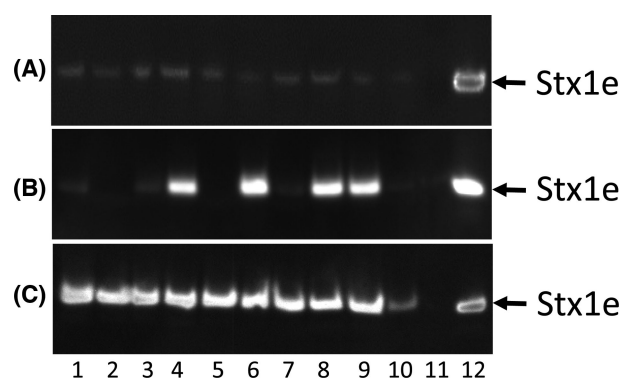

**Figure 3.** Western blot analysis of Stx1e produced by strain RM8530 infected with the *stx*<sub>1e</sub> phage. Lanes 1–10 were loaded with supernatants (7 μL) of bacterial cultures from 10 colonies randomly picked from T<sub>0</sub> (A), T<sub>10</sub> (B) and T<sub>20</sub> (C) plates. Lanes 11–12 were loaded with 0.2 μg of purified Stx1a and Stx1e, respectively. Proteins were separated by SDS-PAGE and probed with a Stx1e-specific monoclonal antibody, Stx1e-3. The Stx1e positions on the blots are indicated by arrows.

## DISCUSSION

Lysogenic phage conversion constitutes an efficient mechanism for rapid dissemination of phage-encoded virulence genes (Krylov 2003; Feiner et al. 2015). While *in vitro* transmission of

Stx1 phages between different bacteria within the same species has been described (Sváb et al. 2015), studies that provide information on cross-genera conversions involving toxigenic and non-toxicogenic strains are still limited, in particular, those regarding susceptibility of commensal strains to Stx1-converting phages from non-*E. coli* strains. In this study, bacterial strains from two genera, RM8530 (*Escherichia*) and M12X01451 (*Enterobacter*), were analyzed and the presence of Stx1a- and Stx1e-encoding phages, both in their lysogenic and virion forms, in these strains was confirmed by PCR analysis of the *stx*<sub>1</sub> genes using genomic and phage DNA with or without DNase treatment. Gene products of *stx*<sub>1a</sub> in RM8530 and *stx*<sub>1e</sub> in M12X01451 were detected in both genomic and phage DNA preparations without antibiotic induction, suggesting the occurrence of spontaneous induction of *stx*-encoding phages (Veses-Garcia et al. 2015). No attempts were made to investigate the presence of converting phages other than the *stx*<sub>1a</sub> or *stx*<sub>1e</sub> phages in the donor strains.

Reproducibility of plaque assays is dependent on both the host strain and the lytic capacity of the phage, and has been shown to be severely limited for Stx-converting phages (Grau-Leal et al. 2015). Despite the efforts to select the optimal conditions for high phage titers in this study, the basal titer in *stx*<sub>1e</sub>-positive phage stock solutions was  $<10^3$  PFU mL<sup>-1</sup> (Muniesa et al. 2004). Plaques formed by both *stx*<sub>1</sub>-encoding prophages (though the *stx*<sub>1e</sub> was more readily identifiable than the *stx*<sub>1a</sub>) were very small and turbid on agar plates (data not shown), which is consistent to the characteristic feature of Stx-converting phages described by others (Saunders et al. 2001; Muniesa et al. 2003). The plaque assay may have not been the ideal method for *stx* phages enumeration in this study, therefore culture-independent methods (McDonald et al. 2010; Rooks et al. 2010) would be considered for improving the quantification of *stx* phages in future investigations.

The infectivity of the *stx*<sub>1a</sub> and *stx*<sub>1e</sub> phages to host strains including *Ent. cloacae* 13047, *Ent. cloacae* M12X01451, *E. coli* DH5 $\alpha$ , *E. coli* 465–97, RM8530, *E. coli* K-12 and *E. coli* 25922 was determined using the spot test based on the development of lysis areas and the OD method (except for the two latter strains), which compares the final ODs of infected cultures and the corresponding counts of the surviving populations 5 h after phage infection. All host strains responded differently to the infection by the *stx*-phage stock solutions in terms of formation of clear lysis plaques and the reduction in population counts (Holguín et al. 2015). The decrease in the culture OD is a relevant qualitative measurement of prophage induction and Stx-phage production (Tyler, Mills and Friedman 2004), and the higher the level of phage production, the lower was the OD value due to bacterial lysis. In this study, the most susceptible hosts to the *stx*<sub>1e</sub> and *stx*<sub>1a</sub> phages were *Ent. cloacae* 13047 and *E. coli* 465–97 strains, which was in line with previously published findings suggesting that *Enterobacter* and O157:H7 are the origins of the respective prophages (McDonough and Butterson 1999; Strauch, Lurz and Beutin 2001). To better understand the mechanisms and evolutionary forces that extend the genetic spectrum of phages from different bacterial genera, each donor strain (RM8530 from *E. coli* and M12X01451 from *Enterobacter*) was respectively grown in the presence of its original phage stock solution (prepared from each strain's induced culture) and the phage stock solution of the opposite donor strain. A sharp decrease in culture OD of M12X01451 strain grown in its original phage stock solution was observed; however, this decrease was not found for the STEC (RM8530) strain grown in the *stx*<sub>1a</sub> phage, possibly due to a mechanism of superinfection immunity present in the *stx*<sub>1a</sub> phage.

Susceptibility of *stx* lysogens to new phages was observed to be greatly dependent on the absence of a highly related bacteriophage within their genome, which confers immunity against the new infecting phage (Bielaszewska et al. 2007). This may serve as a plausible explanation to the spot test data and the OD results, where only 1 log reduction in final population counts of M12X01451 culture after infection by *stx*<sub>1a</sub> phage was observed. M12X01451 was not easily lysed in presence of *stx*<sub>1a</sub> phage, which could be attributed to the spontaneous release of its own prophage (confirmed by PCR) in concentrations that masked the effect of the *stx*<sub>1a</sub> phage (Muniesa et al. 2003).

In this study, the *E. coli* K-12 and *E. coli* ATCC 25922 strains failed to produce any visible lysis areas on overlays seeded with these strains after being spotted with *stx*<sub>1a</sub>- and *stx*<sub>1e</sub>-phage stock solutions. Presence of glucose moieties instead of galactose residues in the terminal position of cell wall lipopolysaccharides (Rakhuba et al. 2010), lack of receptors for the *stx* phages recognition or presence of cryptic phages that mediate immunity (Shaikh and Tarr 2003; Besser et al. 2007) may have contributed to the non-specific phage infection to the cells of these strains.

The ability of Stx1 temperate phages from *E. coli* and non-*E. coli* strains to convert a range of non-pathogenic bacteria into Stx-producing bacteria over a prolonged period of time may have clinical implications, if this process takes place in the human GIT. In this study, we determined the stability of transduced *stx* genes based on the ability of the lysogenized strains to retain the acquired genes up to 20 daily passings in LB broth. The *stx*<sub>1e</sub> gene was stably maintained in progenies of most hosts lysogenized by *stx*<sub>1e</sub> phage as examined by PCR, and PCR products were detected in at least 90% of colonies picked from T<sub>10</sub> and T<sub>20</sub> cultures of *Ent. cloacae* 13047, *E. coli* 465–97 and RM8530. On the other hand, the *stx*<sub>1e</sub> gene was completely lost in *E. coli* DH5 $\alpha$  cells after 20 subcultivation steps. It is possible that the *stx*<sub>1e</sub> phage is more likely maintained within the genome of closely related bacteria (similar serotypes). In contrast, the *stx*<sub>1a</sub> gene was less stable in progenies of host strains infected with the *stx*<sub>1a</sub> phage and seemed to be carried transiently in subcultured cells (Tozzoli et al. 2014). The instability of *stx* genes has been noted among STEC strains (Grotiuz et al. 2006; Yang 2014) and appears to be a fairly common characteristic of non-*E. coli* Stx-producing microorganisms. Subtle differences in phage coat proteins may have an impact on phage stability in these host genomes (Lima et al. 2004).

The ability of the *stx*<sub>1e</sub> phage to infect RM8530 and form stable double lysogens provides an ideal intracellular environment for recombination to expand diversity among Stx phages (Allison et al. 2003; Allison 2007). The generation of double lysogens in the GIT may be of clinical significance, as it contributes to the spread of *stx* genes among different serotypes, and fosters the emergence of new STEC pathotypes with elevated virulence. Additionally, the presence of several *stx* gene copies within the same host may lead to the production of more Stx upon lysis, resulting in severe disease pathology. In this particular study, we randomly picked 35 colonies from the T<sub>20</sub> cultures of the RM8530 double lysogens and sequenced the *stx*<sub>1e</sub> gene. No recombination or sequence variation was found in the acquired *stx*<sub>1e</sub> gene isolated from these colonies that were originally *stx*<sub>1a</sub> positive and repeatedly subcultured over 20 consecutive days.

It is well known that the capacity of Stx-producing bacteria to cause severe disease in humans is closely associated with the Stx production. We studied the ability of lysogens to produce Stx by ELISA and western blot using culture supernatant. The



production of Stx1e was detected by ELISA in all strains lysogenized by *stx<sub>1e</sub>* phage, including *Ent. cloacae* 13047, *E. coli* DH5 $\alpha$ , *E. coli* 465–97 and RM8530, although the percentage of cells expressing the Stx1e varied by hosts and subcultivation steps. Stx1e was not detected in some colonies that were tested *stx<sub>1e</sub>* positive by PCR, which could be reasoned to differences in host response to mitomycin induction (Vethanayagam and Flower 2005). It was reported that the amount of *stx* mRNAs in O157:H7 strains was significantly higher than in strains belonging to other serotypes (de Sablet et al. 2008). This was in agreement with our observation that the amount of Stx1e produced by the *stx<sub>1e</sub>*-positive *E. coli* O157:H7 465–97 cells was much higher than that produced by their *E. coli* DH5 $\alpha$  counterparts. Choi et al. (2010) reported that larger cells have higher proportion of protein synthesis machinery than smaller cells due to the difference in cell volume, which was not in accordance with our results, where the smaller cells of *E. coli* O157:H7 lysogenized strain generally seemed to produce more protein than the relatively larger lysogenized cells of *Ent. cloacae* at the time of infection and throughout the repeated passings.

The lack of Stx1e expression in T<sub>0</sub> colonies of *E. coli* DH5 $\alpha$  could be associated with a possible abortive infection in the strain (Emond and Molineau 2007). The lysogenized host cells after the primary infection may have experienced interrupted phage development, resulting in the release of few or no progeny particles and the death of the infected cells prior to mitomycin induction. Babu and Aravind (2006) reported that *E. coli* adapts to different growth conditions by fine-tuning protein levels, and that initial mutations on the path to adaptation may alter the mRNA levels of some genes. This may serve as an interpretation to why Stx1e was not detected or at non-detectable levels in the T<sub>0</sub> colonies of *E. coli* DH5 $\alpha$  strain, where the cells were not yet adapted to the growth medium; however, after 10 days of adaptable transfers, the Stx1e was detected in the supernatants of the T<sub>10</sub> cells. It should be mentioned that, overall, DH5 $\alpha$  strain was a Stx1e-low expresser, and based on ELISA data (Table S1, Supporting Information), the Stx1e levels were much lower compared to those of other lysogenized strains although 90% of the cells at T<sub>10</sub> are Stx1e positive. It is also possible that the T<sub>0</sub> colonies were expressing the protein as well, but with minor levels that were below the detection limit by ELISA. Optimizing growth conditions for DH5 $\alpha$  lysogens may improve the expression levels of the target protein, which warrants future investigations. The lack of Stx1e expression in T20 colonies was simply due to the loss of the *stx<sub>1e</sub>* gene discussed above.

Surprisingly, Stx1a was not detected in any colonies from strains lysogenized by the *stx<sub>1a</sub>* phage, even in those confirmed *stx<sub>1a</sub>* positive by PCR. Factors such as the location of *stx<sub>1a</sub>* gene in the prophage genome (Aertsen, Faster and Michiels 2005), promoter (Neely and Friedman 1998), host transcription factors (Wagner et al. 2001; Wagner and Waldor 2002; Koitabashi et al. 2006) or other unknown defects in the phage may account for the impaired Stx1a production in the generated lysogens. The failure to detect Stx1a may be associated with an iron-regulated phage promoter, and less iron concentration in the growth medium may enhance the Stx1a production (Wagner et al. 2002). Further studies to compare the morphology, sequence and genomic structure of the *stx<sub>1a</sub>* and *stx<sub>1e</sub>* phages are necessary to address the impaired Stx1a production in the *stx<sub>1a</sub>* lysogens, which may provide interesting perspectives on whether phage control of virulence gene expression is unique to *stx* or can serve as a paradigm that explains regulation of expression of other phage-encoded virulence factors.

## CONCLUSIONS

*Enterobacter cloacae* M12X01451, a strain recently isolated from a human clinical specimen of a patient with a mild diarrheal illness, produces a new subtype of Stx1, named as Stx1e, of prophage origin. The clinical relevance and the role of this strain in human pathogenicity have not yet been addressed. This is the first report of the lysogenization of non-toxicogenic/laboratory strains with a *stx<sub>1e</sub>*-encoding phage induced from the M12X01451 strain, in comparison with a *stx<sub>1a</sub>*-encoding phage induced from a foodborne pathogenic *E. coli* O157:H7 strain; RM8530. The results obtained are of clinical importance, and demonstrate an enormous possibility of occurrence of HGT between clinical strains carrying the *stx*-encoding prophages and bacteria from different genera resembling those colonizing the human GIT. Consequences of this HGT over extended periods of time (frequency of gene acquisition upon transduction, gene stability and Stx production) may result in the conversion of commensal bacterial hosts to pathogens with multiple *stx*-encoding prophages, which is a matter of great clinical concern.

## SUPPLEMENTARY DATA

Supplementary data are available at FEMSPD online.

## ACKNOWLEDGMENTS

The first author was a visiting scientist on a sabbatical leave at the USDA, ARS, Western Regional Research Center (Foodborne Toxin Detection and Prevention Research Unit) from Faculty of Science, Alexandria University (Egypt) in the period August-2015 to April-2016.

## FUNDING

This study was supported by U.S. Department of Agriculture, Agricultural Research Service CRIS project 2030-42000-048-00D.

**Conflict of interest.** None declared.

## REFERENCES

- Aertsen A, Faster D, Michiels CW. Induction of Shiga toxin-converting prophage in *Escherichia coli* by high hydrostatic pressure. *Appl Environ Microb* 2005;71:1155–62.
- Allison HE. Stx-phages: drivers and mediators of the evolution of STEC and STEC-like pathogens. *Future Microbiol* 2007; 2:165–74.
- Allison HE, Sergeant MJ, James CE et al. Immunity profiles of wild-type and recombinant Shiga-like toxin-encoding bacteriophages and characterization of novel double lysogens. *Infect Immun* 2003;71:3409–18.
- Alperi A, Figueroa MJ. Human isolates of *Aeromonas* possess Shiga toxin genes (*stx1* and *stx2*) highly similar to the most virulent gene variants of *Escherichia coli*. *Clin Microbiol Infect* 2010;16:1563–7.
- Anderson B, Rashid MH, Carter C et al. Enumeration of bacteriophage particles: comparative analysis of the traditional plaque assay and real-time QPCR-and nanosight-based assays. *Bacteriophage* 2011;1:86–93.
- Babu MM, Aravind L. Adaptive evolution by optimizing expression levels in different environments. *Trends Microbiol* 2006;14:11–4.

- Besser TE, Shaikh N, Holt NJ et al. Greater diversity of Shiga toxin-encoding bacteriophage insertion sites among *Escherichia coli* O157:H7 isolates from cattle than in those from humans. *Appl Environ Microb* 2007;73:671–9.
- Bielaszewska M, Prager R, Köck R et al. Shiga toxin gene loss and transfer *in vitro* and *in vivo* during enterohemorrhagic *Escherichia coli* O26 infection in humans. *Appl Environ Microb* 2007;73:3144–50.
- Bloch S, Nejman-Faleńczyk B, Topka G et al. UV-sensitivity of Shiga toxin-converting bacteriophage virions  $\Phi$ 24B, 933W, P22, P27 and P32. *Toxins* 2015;7:3727–39.
- Brabban AD, Hite E, Callaway TR. Evolution of foodborne pathogens via temperate bacteriophage-mediated gene transfer. *Foodborne Pathog Dis* 2005;2:287–303.
- Carlson K. Appendix: working with bacteriophages: common techniques and methodological approaches. In: Sulakvelidze A, Kutter E (eds). *Bacteriophages: Biology and Applications*. Boca Raton, FL, USA: CRC Press, 2005, 439–90.
- Chibani-Chennoufi S, Bruttin A, Dillmann ML et al. Phage-host interaction: an ecological perspective. *J Bacteriol* 2004;186:3677–86.
- Choi C, Kuatsjah E, Wu E et al. The effect of cell size on the burst size of T4 bacteriophage infections of *Escherichia coli* B23. *J Exp Microbiol Immunol* 2010;14:85–91.
- Cornick NA, Helgerson AF, Mai V et al. *In vivo* transduction of an Stx-encoding phage in ruminants. *Appl Environ Microb* 2006;72:5086–8.
- Davin-Regli A, Jean-Marie P. *Enterobacter aerogenes* and *Enterobacter cloacae*: versatile bacterial pathogens confronting antibiotic treatment. *Front Microbiol* 2015;6:392.
- de Sablet T, Bertin Y, Vareille M et al. Differential expression of stx<sub>2</sub> variants in Shiga toxin-producing *Escherichia coli* belonging to seropathotypes A and C. *Microbiol* 2008;154:176–86.
- Emond E, Molineau S. Bacteriophages and food fermentations. In: McGrathe S, Van Sinderen D (eds). *Bacteriophages, Genetics and Molecular Biology*. Norfolk, UK: Caiste Academic Press, 2007.
- Ethelberg S, Olsen KE, Scheutz F et al. Virulence factors for hemolytic uremic syndrome, Denmark. *Emerg Infect Dis* 2004;10:842–7.
- Feiner R, Argov T, Rabinovich L et al. A new perspective on lysogeny: prophages as active regulatory switches of bacteria. *Nat Rev Microbiol* 2015;13:641–50.
- Gamage SD, McGannon CM, Weiss AA. *Escherichia coli* serogroup O107/O117 lipopolysaccharide binds and neutralizes Shiga toxin 2. *J Bacteriol* 2004;186:5506–12.
- Gamage SD, Strasser JE, Chalk CL et al. Nonpathogenic *Escherichia coli* can contribute to the production of Shiga toxin. *Infect Immun* 2003;71:3107–15.
- Grau-Leal F, Quirós P, Martínez-Castillo A et al. Free Shiga toxin 1-encoding bacteriophages are less prevalent than Shiga toxin 2 phages in extraintestinal environments. *Environ Microbiol* 2015;17:4790–801.
- Grotiuz G, Sirok A, Gadea P et al. Shiga toxin 2-producing *Acinetobacter haemolyticus* associated with a case of bloody diarrhea. *J Clin Microbiol* 2006;44:3838–41.
- Gyles C, Boerlin P. Horizontally transferred genetic elements and their role in pathogenesis of bacterial disease. *Vet Pathol* 2013;51(2):328–340.
- He X, Kong Q, Patfield S et al. A New Immunoassay for detecting all subtypes of Shiga toxins produced by Shiga toxin-producing *E. coli* in ground beef. *PLoS One* 2016;11:e0148092.
- Holguín AV, Rangel G, Clavijo V et al. Phage  $\Phi$ Pan70, a putative temperate phage, controls *Pseudomonas aeruginosa* in planktonic, biofilm and burn mouse model assays. *Viruses* 2015;7:4602–23.
- Imamovic L, Muniesa M. Characterizing RecA-independent induction of Shiga toxin 2-encoding phages by EDTA treatment. *PLoS One* 2012;7:e32393.
- Kawano K, Okada M, Haga T et al. Relationship between pathogenicity for humans and stx genotype in Shiga toxin-producing *Escherichia coli* serotype O157. *Eur J Clin Microbiol* 2008;27:227–32.
- Kelly BG, Vespermann A, Bolton DJ. Horizontal gene transfer of virulence determinants in selected bacterial foodborne pathogens. *Food Chem Toxicol* 2009;47:969–77.
- Koitaibashi T, Vuddhakul V, Radu S et al. Genetic characterization of *Escherichia coli* O157: H7– strains carrying the stx<sub>2</sub> gene but not producing Shiga toxin 2. *Microbiol Immunol* 2006;50:135–48.
- Krylov VN. Role of horizontal gene transfer by bacteriophages in the origin of pathogenic bacteria. *Genetika* 2003;39:595–620.
- Krzywińska S, Mokracka J, Koczura R et al. Cytotoxic activity of *Enterobacter cloacae* human isolates. *FEMS Immunol Med Microb* 2009;56:248–52.
- Kyle JL, Cummings CA, Parker CT et al. *Escherichia coli* serotype O55: H7 diversity supports parallel acquisition of bacteriophage at Shiga toxin phage insertion sites during evolution of the O157: H7 lineage. *J Bacteriol* 2012;194:1885–96.
- Lima SM, Peabody DS, Silva JL et al. Mutations in the hydrophobic core and in the protein-RNA interface affect the packing and stability of icosahedral viruses. *Eur J Biochem* 2004;271:135–45.
- Łoś JM, Łoś M, Węgrzyn G. Bacteriophages carrying Shiga toxin genes: genomic variations, detection and potential treatment of pathogenic bacteria. *Future Microbiol* 2011;6:909–24.
- Lunder M, Bratkovic T, Urleb U et al. Ultrasound in phage display: a new approach to nonspecific elution. *Biotechniques* 2008;44:893–900.
- Maaß A, Heiseler T, Maaß F et al. A general strategy for antibody library screening via conversion of transient target binding into permanent reporter deposition. *Protein Eng Des Sel* 2014;27:41–47.
- McAllister LJ, Bent SJ, Petty NK et al. Genomic comparison of Two O111:H– enterohemorrhagic *Escherichia coli* isolates from a historic hemolytic-uremic syndrome outbreak in Australia. *Infect Immun* 2016;84:775–81.
- McDonald JE, Smith DL, Fogg PC et al. High-throughput method for rapid induction of prophages from lysogens and its application in the study of Shiga toxin-encoding *Escherichia coli* strains. *Appl Environ Microb* 2010;76:2360–5.
- McDonough MA, Butterton JR. Spontaneous tandem amplification and deletion of the Shiga toxin operon in *Shigella dysenteriae* 1. *Mol Microbiol* 1999;34:1058–69.
- Mauro SA, Koudelka GB. Shiga toxin: expression, distribution, and its role in the environment. *Toxins* 2011;3:608–25.
- Mezzatesta ML, Gona F, Stefani S. *Enterobacter cloacae* complex: clinical impact and emerging antibiotic resistance. *Future Microbiol* 2012;7:887–902.
- Muniesa M, Blanco JE, de Simón M et al. Diversity of stx<sub>2</sub> converting bacteriophages induced from Shiga toxin-producing *Escherichia coli* strains isolated from cattle. *Microbiol* 2004;150:2959–71.
- Muniesa M, De Simon M, Prats G et al. Shiga toxin 2-converting bacteriophages associated with clonal variability in *Escherichia coli* O157:H7 strains of human origin isolated from a single outbreak. *Infect Immun* 2003;71:4554–62.
- Muniesa M, Serra-Moreno R, Jofre J. Free Shiga toxin bacteriophages isolated from sewage showed diversity although

- the stx genes appeared conserved. *Environ Microbiol* 2004; **6**:716–25.
- Neely MN, Friedman DT. Arrangement and functional identification of genes in the regulatory region of lambdoid phage H-19B, a carrier of a Shiga-like toxin. *Gene* 1998; **223**:105–13.
- Ohnishi M, Terajima J, Kurokawa K et al. Genomic diversity of enterohemorrhagic *Escherichia coli* O157 revealed by whole genome PCR scanning. *P Natl Acad Sci USA* 2002; **99**:17043–8.
- Ooka T, Seto K, Kawano K et al. Clinical significance of *Escherichia albertii*. *Emerg Infect Dis* 2012; **18**:488–92.
- Orth D, Grif K, Khan AB et al. The Shiga toxin genotype rather than the amount of Shiga toxin or the cytotoxicity of Shiga toxin *in vitro* correlates with the appearance of the hemolytic uremic syndrome. *Diagn Micr Infect Dis* 2007; **59**:235–42.
- Pacheco AR, Sperandio V. Shiga toxin in enterohemorrhagic *E. coli*: regulation and novel anti-virulence strategies. *Front Cell Infect Microbiol* 2012; **2**:1–2.
- Paul JH, Weinbauer M. Detection of lysogeny in marine environments. In: Wilhelm SW, Weinbauer MG, Suttle CA (eds). *Manual Aquatic Viral Ecology*. ASLO: Waco, TX, USA, 2010, pp 30–33.
- Probert WS, McQuaid C, Schrader K. Isolation and identification of an *Enterobacter cloacae* strain producing a novel subtype of Shiga Toxin type 1. *J Clin Microbiol* 2014; **52**:2346–51.
- Rakhuba DV, Kolomiets EI, Dey ES et al. Bacteriophage receptors, mechanisms of phage adsorption and penetration into host cell. *Pol J Microbiol* 2010; **59**:145–55.
- Rooks DJ, Yan Y, McDonald JE et al. Development and validation of a qPCR-based method for quantifying Shiga toxin-encoding and other lambdoid bacteriophages. *Environ Microbiol* 2010; **12**:1194–204.
- Sambrook J, Russell DW. *Molecular Cloning: A Laboratory Manual*. Cold Spring Harbor, NY: Cold Spring Harbor Laboratory Press, 2001.
- Saunders JR, Allison H, James CE et al. Phage-mediated transfer of virulence genes. *J Chem Technol Biot* 2001; **76**:662–6.
- Schmidt H, Montag M, Bockemuhl J et al. Shiga-like toxin II-related cytotoxins in *Citrobacter freundii* strains from humans and beef samples. *Infect Immun* 1993; **61**:534–43.
- Shaikh N, Tarr PI. *Escherichia coli* O157:H7 Shiga toxin encoding bacteriophages: integrations, excisions, truncations, and evolutionary implications. *J Bacteriol* 2003; **185**:3596–605.
- Scheutz F, Teel LD, Beutin L et al. Multicenter evaluation of a sequence-based protocol for subtyping Shiga toxins and standardizing Stx nomenclature. *J Clin Microbiol* 2012; **1**:2951–63.
- Skinner C, Patfield S, Khalil R et al. New monoclonal antibodies against a novel subtype of Shiga toxin 1 produced by *Enterobacter cloacae* and their use in analysis of human serum. *mSphere* 2016; **1**:e00099–15.
- Skinner C, Patfield S, Stanker L et al. Development of monoclonal antibodies and immunoassays for sensitive and specific detection of Shiga toxin Stx2f. *PLoS One* 2013; **8**:e76563.
- Smith DL, Rooks DJ, Fogg PC et al. Comparative genomics of Shiga toxin encoding bacteriophages. *BMC Genomics* 2012; **13**:311.
- Strauch E, Hammerl JA, Konietzny A et al. Bacteriophage 2851 is a prototype phage for dissemination of the Shiga toxin variant gene 2c in *Escherichia coli* O157:H7. *Infect Immun* 2008; **76**:5466–77.
- Strauch E, Lurz R, Beutin L. Characterization of a Shiga Toxin-encoding temperate bacteriophage of *Shigella sonnei*. *Infect Immun* 2001; **69**:7588–95.
- Strauch E, Schaudinn C, Beutin L. First-time isolation and characterization of a bacteriophage encoding the Shiga toxin 2c variant, which is globally spread in strains of *Escherichia coli* O157. *Infect Immun* 2004; **72**:7030–9.
- Sváb D, Bálint, Maróti G et al. A novel transducible chimeric phage from *Escherichia coli* O157: H7 Sakai strain encoding Stx1 production. *Infect Genet Evol* 2015; **29**:42–47.
- Tóth I, Schmidt H, Dow M et al. Transduction of porcine enteropathogenic *Escherichia coli* with a derivative of a Shiga toxin 2-encoding bacteriophage in a porcine ligated ileal loop system. *Appl Environ Microb* 2003; **69**:7242–7.
- Tóth I, Sváb D, Bálint B et al. Comparative analysis of the Shiga toxin converting bacteriophage first detected in *Shigella sonnei*. *Infect Genet Evol* 2016; **37**:150–7.
- Tozzoli R, Grande L, Michelacci V et al. Shiga toxin-converting phages and the emergence of new pathogenic *Escherichia coli*: a world in motion. *Front Cell Infect Microbiol* 2014; **4**:80.
- Tyler JS, Mills MJ, Friedman DI. The operator an early promoter region of the Shiga toxin type 2-encoding bacteriophage 933W and control of toxin expression. *J Bacteriol* 2004; **186**:7670–9.
- USDA, FSIS. Detection, isolation and identification of *Escherichia coli* O157:H7 from meat products. Microbiology Laboratory Guidebook (MLG) 5.06, 2012.
- Velandia CVG, Krüger A, Parma YR et al. Differences in Shiga toxin and phage production among stx2g-positive STEC strains. *Front Cell Infect Microbiol* 2012; **2**:82.
- Veses-Garcia M, Liu X, Rigden DJ et al. Transcriptomic analysis of Shiga-toxigenic bacteriophage carriage reveals a profound regulatory effect on acid resistance in *Escherichia coli*. *Appl Environ Microb* 2015; **81**:8118–25.
- Vethanayagam JG, Flower AM. Decreased gene expression from T7 promoters may be due to impaired production of active T7 RNA polymerase. *Microb Cell Fact* 2005; **4**:3.
- Wagner PL, Acheson DW, Waldor MK. Isogenic lysogens of diverse Shiga toxin 2-encoding bacteriophages produce markedly different amount of Shiga toxin. *Infect Immun* 1999; **67**:6710–4.
- Wagner PL, Neely MN, Zhang X et al. Role for a phage promoter in Shiga Toxin 2 expression from a pathogenic *Escherichia coli* strain. *J Bacteriol* 2001; **183**:2081–5.
- Wagner PL, Livny J, Neely MN et al. Bacteriophage control of Shiga toxin 1 production and release by *Escherichia coli*. *Mol Microbiol* 2002; **44**:957–70.
- Wagner PL, Waldor MK. Bacteriophage control of bacterial virulence. *Infect Immun* 2002; **70**:3985–93.
- Węgrzyn G, Licznerska K, Węgrzyn A. Phage  $\lambda$ -new insights into regulatory circuits. *Adv Virus Res* 2012; **82**:155–78.
- Węgrzyn G, Węgrzyn A. Genetic switches during bacteriophage lambda development. *Prog Nucleic Acid Re* 2005; **79**:1–48.
- Wick LM, Qi W, Lacher DW et al. Evolution of genomic content in the stepwise emergence of *Escherichia coli* O157:H7. *J Bacteriol* 2005; **187**:1783–91.
- Yang YA. Genetic diversity of Shiga toxin-producing prophages among *Escherichia coli* isolated from cattle in multiple herds. *Doctoral Dissertation*, Michigan State University, 2014.
- Zhang W, Bielaszewska M, Kuczius T et al. Identification characterization and distribution of a Shiga toxin 1 gene variant (stx1c) in *Escherichia coli* strains isolated from humans. *J Clin Microbiol* 2002; **40**:1441–6.
- Zhang X, McDaniel AD, Wolf LE et al. Quinolone antibiotics induce Shiga toxin-encoding bacteriophages, toxin production, and death in mice. *J Infect Dis* 2000; **181**:664–70.
